# Supplementary material
Source: PubMed Central journal article supplement (PMC2871502)
Supplement: supp_M109.089748_jbc.M109.089748-2.pdf [file supp_M109.089748_jbc.M109.089748-2.pdf]

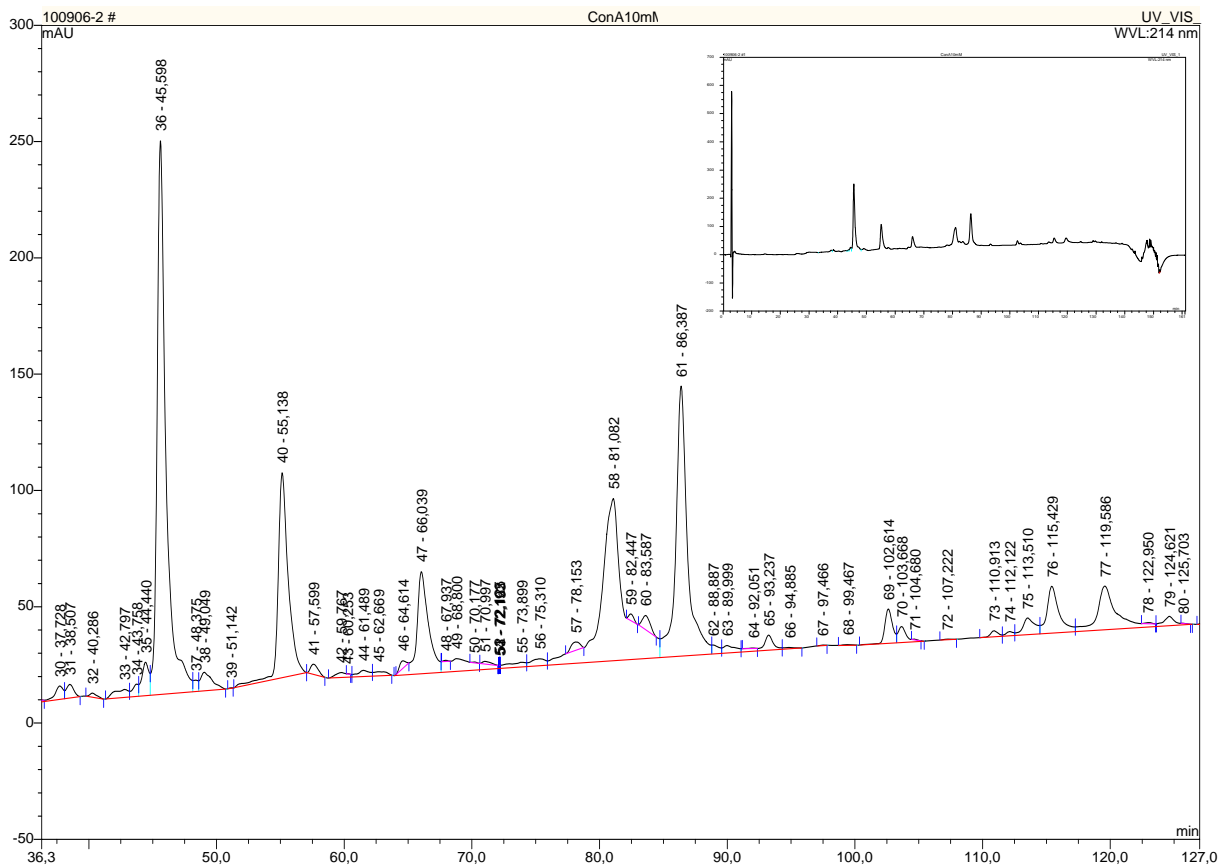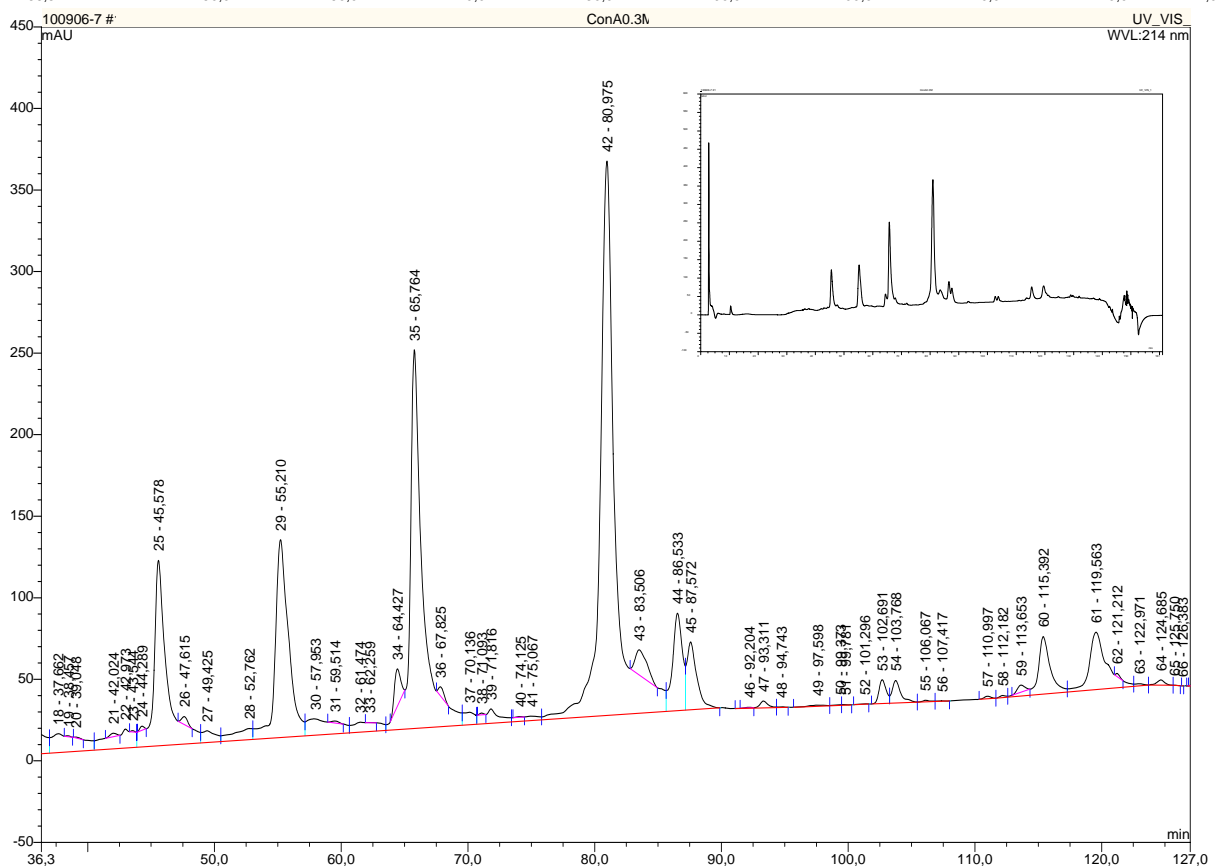

Supporting material 2 Van Antwerpen et al.

Chromatograms of the elutions obtained with a tryptic digest of recombinant myeloperoxidase on a ConA-sepharose column and the addition of respectively 0.01 M and 0.3 M of  $\alpha$ -methyl-D-glucoside. Both elutions were injected in the chromatographic system described in the method section. Inset: the total chromatogram.
