# Supplementary material
Source: PubMed Central journal article supplement (PMC2871502)
Supplement: supp_M109.089748_jbc.M109.089748-5.pdf [file supp_M109.089748_jbc.M109.089748-5.pdf]

Supporting material 5 : MALDI TOF spectra of site by site N-glycosylation comparison. Y axes represent the relative abundance expressed in percent. Color and form codes are as in table 1.
