# Supplementary material
Source: PubMed Central journal article supplement (PMC2871502)
Supplement: supp_M109.089748_jbc.M109.089748-6.pdf [file supp_M109.089748_jbc.M109.089748-6.pdf]

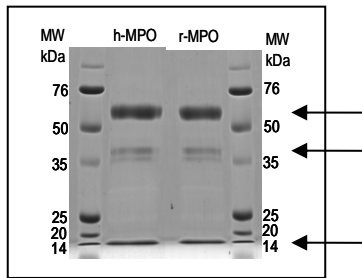

Supporting Material 6 Van Antwerpen et al.

Electrophoretogram of h-myeloperoxidase (*left*) and r-myeloperoxidase (*right*), showing 3 bands at 57 kDa, 37 kDa and 15 kDa (arrows).
