# Supplementary material
Source: PubMed Central journal article supplement (PMC2871502)
Supplement: supp_M109.089748_jbc.M109.089748-7.pdf [file supp_M109.089748_jbc.M109.089748-7.pdf]

## A : Recombinant myeloperoxidase :

Agilent Spectrum Mill

|     |                                              |                                      |                                              |                                       |                                      |                                       |                                              |                                              |     |
|-----|----------------------------------------------|--------------------------------------|----------------------------------------------|---------------------------------------|--------------------------------------|---------------------------------------|----------------------------------------------|----------------------------------------------|-----|
| 1   | TPQPSEGAAP                                   | AVLGEVDTSL                           | VLSSMEEAKQ                                   | LVDKAYKERR                            | ESIKQRLRSG                           | SASPMELLSY                            | FKQPVAATR                                    | AVR <b>AADYLHV</b>                           | 80  |
| 81  | <b>ALDLLER</b> KLR                           | SLWR <b>RPFNVT</b>                   | <b>DVLT</b> PAQLNV                           | <b>LSK</b> SSGCAYQ                    | DVGVT <b>C</b> PEQD                  | <b>KYR</b> TITGM <b>CN</b>            | <b>NRR</b> SPTLGAS                           | <b>NRA</b> FVRLPA                            | 160 |
| 161 | EYEDGFSLPY                                   | GWTPGV <b>K</b> RNG                  | FPVALAR <b>AVS</b>                           | NEIV <b>R</b> FPTDQ                   | LTPD <b>Q</b> ERSLM                  | FMQWGQLLDH                            | DLDF <b>T</b> PEPAA                          | <b>RAS</b> F <b>V</b> T <b>GV</b> <b>N</b> C | 240 |
| 241 | <b>ETS</b> <b>CV</b> Q <b>Q</b> PP <b>C</b>  | <b>FPL</b> K <b>I</b> PPNDP          | <b>RI</b> KNQAD <b>C</b> IP                  | <b>FFR</b> SC <b>P</b> AC <b>P</b> G  | <b>SNT</b> IR <b>N</b> QIN           | ALTSFVDASM                            | VYGSEEP <b>L</b> AR                          | <b>NLR</b> <b>N</b> MS <b>N</b> QL <b>G</b>  | 320 |
| 321 | <b>LLAV</b> <b>N</b> Q <b>R</b> FQD          | <b>NGR</b> <b>ALL</b> PF <b>D</b> N  | <b>LHDD</b> <b>P</b> CL <b>L</b> T <b>N</b>  | <b>RSAR</b> IP <b>C</b> FLA           | GD <b>T</b> RSSEMPE                  | L <b>T</b> SMHT <b>L</b> L <b>L</b> R | E <b>H</b> NRLATE <b>L</b> K                 | <b>SLN</b> PRWDGER                           | 400 |
| 401 | LYQE <b>A</b> R <b>K</b> IVG                 | <b>AMV</b> Q <b>I</b> IT <b>Y</b> RD | YLPLVLG <b>P</b> TA                          | MR <b>K</b> YLPT <b>Y</b> RS          | <b>YND</b> S <b>V</b> DP <b>R</b> IA | NVFTNAFRYG                            | HTLIQ <b>P</b> FM <b>F</b> R                 | <b>LDN</b> RYQ <b>P</b> M <b>E</b> P         | 480 |
| 481 | NPRV <b>L</b> SR <b>V</b> F                  | <b>FAS</b> WR <b>V</b> V <b>L</b> EG | <b>GID</b> P <b>I</b> L <b>R</b> GLM         | ATPA <b>K</b> L <b>N</b> R <b>Q</b> N | <b>QIA</b> VDEIR <b>E</b> R          | LFEQ <b>V</b> M <b>R</b> IGL          | D <b>L</b> PAL <b>N</b> M <b>Q</b> RS        | <b>RDH</b> GLPGYNA                           | 560 |
| 561 | <b>WRR</b> <b>F</b> C <b>G</b> LP <b>Q</b> P | <b>ETV</b> Q <b>L</b> GT <b>V</b> L  | <b>RNL</b> K <b>L</b> ARK <b>L</b> M         | EQYGT <b>P</b> NNID                   | I <b>W</b> MG <b>G</b> VSEPL         | <b>KRK</b> GR <b>V</b> GP <b>L</b> L  | <b>ACI</b> IG <b>T</b> Q <b>F</b> R <b>K</b> | <b>LRD</b> GD <b>R</b> FWWE                  | 640 |
| 641 | NEGV <b>F</b> SM <b>Q</b> QR                 | <b>QAL</b> A <b>Q</b> IS <b>L</b> PR | <b>IIC</b> D <b>N</b> T <b>G</b> IT <b>T</b> | <b>VSK</b> NNIFMSN                    | SYPR <b>D</b> F <b>V</b> NC <b>S</b> | <b>TLP</b> AL <b>N</b> LA <b>S</b> W  | <b>REAS</b>                                  | 704                                          |     |

The matched peptides cover 30% (216/704 AA's) of the protein.

Protein Name: **MPO**

Species: **HUMAN**

**PN\_MPO\_01**.user Accession #: 1

MS Digest Index #: 1

Masses are:

pI of Protein: **9.26**

Protein MW: **79635.8** Da

Amino Acid Composition: **A51 C15 D35 E34 F29 G40 H7 I29 K21 L77 M20 N41 P53 Q34 R65 S45 T37 V41 W11 Y19**

MS Digest - Agilent Spectrum Mill Rev. 3.3.078

## B : Recombinant myeloperoxidase incubated in the absence of enzymes:

Agilent Spectrum Mill

|     |                                              |                                      |                                              |                                       |                                      |                                       |                                              |                                              |     |
|-----|----------------------------------------------|--------------------------------------|----------------------------------------------|---------------------------------------|--------------------------------------|---------------------------------------|----------------------------------------------|----------------------------------------------|-----|
| 1   | TPQPSEGAAP                                   | AVLGEVDTSL                           | VLSSMEEAKQ                                   | LVDKAYKERR                            | ESIKQRLRSG                           | SASPMELLSY                            | FKQPVAATR                                    | AVR <b>AADYLHV</b>                           | 80  |
| 81  | <b>ALDLLER</b> KLR                           | SLWR <b>RPFNVT</b>                   | <b>DVLT</b> PAQLNV                           | <b>LSK</b> SSGCAYQ                    | DVGVT <b>C</b> PEQD                  | <b>KYR</b> TITGM <b>CN</b>            | <b>NRR</b> SPTLGAS                           | <b>NRA</b> FVRLPA                            | 160 |
| 161 | EYEDGFSLPY                                   | GWTPGV <b>K</b> RNG                  | FPVALAR <b>AVS</b>                           | NEIV <b>R</b> FPTDQ                   | LTPD <b>Q</b> ERSLM                  | FMQWGQLLDH                            | DLDF <b>T</b> PEPAA                          | <b>RAS</b> F <b>V</b> T <b>GV</b> <b>N</b> C | 240 |
| 241 | <b>ETS</b> <b>CV</b> Q <b>Q</b> PP <b>C</b>  | <b>FPL</b> K <b>I</b> PPNDP          | <b>RI</b> KNQAD <b>C</b> IP                  | <b>FFR</b> SC <b>P</b> AC <b>P</b> G  | <b>SNT</b> IR <b>N</b> QIN           | ALTSFVDASM                            | VYGSEEP <b>L</b> AR                          | <b>NLR</b> <b>N</b> MS <b>N</b> QL <b>G</b>  | 320 |
| 321 | <b>LLAV</b> <b>N</b> Q <b>R</b> FQD          | <b>NGR</b> <b>ALL</b> PF <b>D</b> N  | <b>LHDD</b> <b>P</b> CL <b>L</b> T <b>N</b>  | <b>RSAR</b> IP <b>C</b> FLA           | GD <b>T</b> RSSEMPE                  | L <b>T</b> SMHT <b>L</b> L <b>L</b> R | E <b>H</b> NRLATE <b>L</b> K                 | <b>SLN</b> PRWDGER                           | 400 |
| 401 | LYQE <b>A</b> R <b>K</b> IVG                 | <b>AMV</b> Q <b>I</b> IT <b>Y</b> RD | YLPLVLG <b>P</b> TA                          | MR <b>K</b> YLPT <b>Y</b> RS          | <b>YND</b> S <b>V</b> DP <b>R</b> IA | NVFTNAFRYG                            | HTLIQ <b>P</b> FM <b>F</b> R                 | <b>LDN</b> RYQ <b>P</b> M <b>E</b> P         | 480 |
| 481 | NPRV <b>L</b> SR <b>V</b> F                  | <b>FAS</b> WR <b>V</b> V <b>L</b> EG | <b>GID</b> P <b>I</b> L <b>R</b> GLM         | ATPA <b>K</b> L <b>N</b> R <b>Q</b> N | <b>QIA</b> VDEIR <b>E</b> R          | LFEQ <b>V</b> M <b>R</b> IGL          | D <b>L</b> PAL <b>N</b> M <b>Q</b> RS        | <b>RDH</b> GLPGYNA                           | 560 |
| 561 | <b>WRR</b> <b>F</b> C <b>G</b> LP <b>Q</b> P | <b>ETV</b> Q <b>L</b> GT <b>V</b> L  | <b>RNL</b> K <b>L</b> ARK <b>L</b> M         | EQYGT <b>P</b> NNID                   | I <b>W</b> MG <b>G</b> VSEPL         | <b>KRK</b> GR <b>V</b> GP <b>L</b> L  | <b>ACI</b> IG <b>T</b> Q <b>F</b> R <b>K</b> | <b>LRD</b> GD <b>R</b> FWWE                  | 640 |
| 641 | NEGV <b>F</b> SM <b>Q</b> QR                 | <b>QAL</b> A <b>Q</b> IS <b>L</b> PR | <b>IIC</b> D <b>N</b> T <b>G</b> IT <b>T</b> | <b>VSK</b> NNIFMSN                    | SYPR <b>D</b> F <b>V</b> NC <b>S</b> | <b>TLP</b> AL <b>N</b> LA <b>S</b> W  | <b>REAS</b>                                  | 704                                          |     |

The matched peptides cover 34% (246/704 AA's) of the protein.

Protein Name: **MPO**

Species: **HUMAN**

**PN\_MPO\_01**.user Accession #: 1

MS Digest Index #: 1

Masses are:

pI of Protein: **9.26**

Protein MW: **79635.8** Da

Amino Acid Composition: **A51 C15 D35 E34 F29 G40 H7 I29 K21 L77 M20 N41 P53 Q34 R65 S45 T37 V41 W11 Y19**

MS Digest - Agilent Spectrum Mill Rev. 3.3.078

## C : Recombinant myeloperoxidase incubated in the presence of enzymes

Agilent Spectrum Mill

|     |                                       |                                               |                                                       |                                               |                                                      |                                                       |                                                       |                                                      |     |
|-----|---------------------------------------|-----------------------------------------------|-------------------------------------------------------|-----------------------------------------------|------------------------------------------------------|-------------------------------------------------------|-------------------------------------------------------|------------------------------------------------------|-----|
| 1   | TPQPSEGAAP                            | AVLGEVDTSL                                    | VLSSMEEAKQ                                            | LVLDKAYKER                                    | ESIKQRLRSG                                           | SASPMELLSY                                            | FKQPVAATR                                             | AVRAADYLHV                                           | 80  |
| 81  | ALDLLERKLR                            | SLWR <b>RPFNVT</b>                            | <b>DVLT</b> PAQLNV                                    | <b>LSK</b> SSGCAYQ                            | DVGVT <b>C</b> PEQD                                  | <b>KYR</b> TITGM <b>CN</b>                            | <b>NRR</b> SPTLGAS                                    | <b>NRA</b> FVRLPA                                    | 160 |
| 161 | EYEDGFSLPY                            | GWTPGVK <b>RNG</b>                            | FPVALARAVS                                            | NEIVR <b>F</b> PTDQ                           | LTPDQ <b>E</b> RLM                                   | FMQWGQLLDH                                            | DLDF <b>T</b> PEPAA                                   | <b>RAS</b> FVTGV <b>NC</b>                           | 240 |
| 241 | ET <b>SCV</b> QPP <b>C</b>            | FPL <b>K</b> I <b>P</b> NDP                   | <b>R</b> IK <b>NQ</b> AD <b>C</b> IP                  | <b>F</b> FR <b>SC</b> PAC <b>PG</b>           | <b>S</b> NT <b>IR</b> NQIN                           | ALTSFVDASM                                            | VYGSE <b>E</b> PLAR                                   | <b>NLR</b> <b>NMS</b> NQLG                           | 320 |
| 321 | LLAV <b>NQR</b> FQD                   | NGR <b>ALL</b> PF <b>DN</b>                   | LHDD <b>P</b> CL <b>L</b> T <b>N</b>                  | <b>RS</b> AR <b>I</b> P <b>C</b> FLA          | GD <b>TR</b> SSEMPE                                  | L <b>TS</b> MHTLLR                                    | E <b>HN</b> RLATE <b>LK</b>                           | <b>SLN</b> PRWDGER                                   | 400 |
| 401 | LYQ <b>E</b> AR <b>K</b> IVG          | AMVQ <b>I</b> ITY <b>RD</b>                   | YLPLV <b>L</b> G <b>P</b> TA                          | MR <b>K</b> YLPT <b>Y</b> RS                  | <b>Y</b> ND <b>S</b> VDP <b>R</b> IA                 | NVFT <b>NA</b> FRYG                                   | HT <b>L</b> IQ <b>P</b> FM <b>FR</b>                  | <b>LDN</b> RYQ <b>M</b> EP                           | 480 |
| 481 | NPRV <b>PL</b> SR <b>V</b> F          | FAS <b>WR</b> V <b>V</b> LE <b>G</b>          | <b>G</b> ID <b>P</b> IL <b>R</b> GLM                  | AT <b>PA</b> K <b>L</b> NR <b>Q</b> N         | <b>Q</b> IA <b>V</b> DE <b>I</b> ER <b>R</b>         | <b>L</b> FE <b>Q</b> VM <b>R</b> IG <b>L</b>          | <b>D</b> L <b>P</b> AL <b>N</b> M <b>Q</b> RS         | <b>R</b> DHGL <b>P</b> G <b>Y</b> NA                 | 560 |
| 561 | <b>WRR</b> FC <b>G</b> LP <b>Q</b> P  | ETV <b>G</b> Q <b>L</b> GT <b>V</b> L         | <b>R</b> N <b>L</b> K <b>L</b> AR <b>K</b> L <b>M</b> | E <b>Q</b> Y <b>G</b> TP <b>N</b> NI <b>D</b> | I <b>W</b> M <b>G</b> V <b>S</b> E <b>P</b> L        | <b>K</b> R <b>K</b> G <b>R</b> V <b>G</b> PL <b>L</b> | <b>A</b> C <b>I</b> I <b>G</b> T <b>Q</b> FR <b>K</b> | <b>L</b> R <b>D</b> G <b>D</b> R <b>F</b> W <b>E</b> | 640 |
| 641 | NE <b>G</b> V <b>F</b> SM <b>Q</b> QR | <b>Q</b> AL <b>A</b> Q <b>I</b> SL <b>P</b> R | <b>I</b> IC <b>D</b> NT <b>G</b> IT <b>T</b>          | <b>V</b> SK <b>N</b> I <b>F</b> MS <b>N</b>   | <b>S</b> Y <b>P</b> R <b>D</b> V <b>N</b> C <b>S</b> | <b>T</b> LPAL <b>N</b> LA <b>S</b> W                  | <b>R</b> E <b>A</b> S                                 | 704                                                  |     |

The matched peptides cover 19% (136/704 AA's) of the protein.

Protein Name: MPO

Species: HUMAN

PN\_MPO\_01.user Accession #: 1

MS Digest Index #: 1

Masses are:

pI of Protein: 9.26

Protein MW: 79635.8 Da

Amino Acid Composition: A51 C15 D35 E34 F29 G40 H7 I29 K21 L77 M20 N41 P53 Q34 R65 S45 T37 V41 W11 Y19

MS Digest - Agilent Spectrum Mill Rev. 3.3.078

## D: Recombinant mutant myeloperoxidase (Q257→T)

|     |                                                        |                                                        |                                                        |                                                        |                                                        |                                                        |                                                        |                                                        |     |
|-----|--------------------------------------------------------|--------------------------------------------------------|--------------------------------------------------------|--------------------------------------------------------|--------------------------------------------------------|--------------------------------------------------------|--------------------------------------------------------|--------------------------------------------------------|-----|
| 1   | MGVFFSSSLR                                             | <b>C</b> MVDL <b>G</b> PC <b>WA</b>                    | GGLT <b>A</b> EM <b>K</b> LL                           | LALAG <b>L</b> L <b>A</b> IL                           | AT <b>P</b> Q <b>P</b> SE <b>G</b> AA                  | PAVLGEVDTS                                             | LVLSS <b>M</b> E <b>E</b> AK                           | QLVD <b>K</b> AY <b>K</b> ER                           | 80  |
| 81  | <b>R</b> ES <b>I</b> K <b>Q</b> RL <b>R</b> GS         | SAS <b>P</b> M <b>E</b> LL <b>S</b>                    | Y <b>F</b> K <b>Q</b> P <b>V</b> A <b>A</b> T <b>R</b> | TAV <b>R</b> A <b>A</b> D <b>Y</b> LH                  | VALD <b>L</b> L <b>E</b> R <b>K</b> L                  | <b>R</b> SL <b>W</b> R <b>RP</b> FN <b>V</b>           | <b>T</b> D <b>V</b> L <b>T</b> PA <b>Q</b> L <b>N</b>  | <b>V</b> LS <b>K</b> SS <b>G</b> C <b>A</b> Y          | 160 |
| 161 | Q <b>D</b> V <b>G</b> V <b>T</b> C <b>P</b> EQ         | D <b>K</b> Y <b>R</b> T <b>I</b> T <b>G</b> M <b>C</b> | <b>N</b> N <b>R</b> S <b>P</b> T <b>L</b> G <b>A</b>   | <b>S</b> N <b>R</b> A <b>F</b> V <b>E</b> W <b>L</b> P | A <b>E</b> Y <b>E</b> D <b>G</b> F <b>S</b> L <b>P</b> | Y <b>G</b> W <b>T</b> P <b>G</b> V <b>K</b> R <b>N</b> | <b>G</b> F <b>F</b> V <b>A</b> L <b>A</b> R <b>A</b> V | <b>S</b> N <b>E</b> I <b>V</b> R <b>F</b> P <b>T</b> D | 240 |
| 241 | Q <b>L</b> T <b>P</b> D <b>Q</b> E <b>R</b> S <b>L</b> | M <b>F</b> M <b>Q</b> W <b>G</b> T <b>L</b> L <b>D</b> | H <b>D</b> L <b>D</b> F <b>T</b> P <b>E</b> P <b>A</b> | <b>A</b> R <b>A</b> S <b>F</b> V <b>T</b> G <b>V</b> N | <b>C</b> E <b>T</b> S <b>C</b> V <b>Q</b> Q <b>P</b> P | <b>C</b> F <b>P</b> L <b>K</b> I <b>P</b> P <b>N</b> D | <b>P</b> R <b>I</b> K <b>N</b> Q <b>A</b> D <b>C</b> I | <b>P</b> F <b>F</b> R <b>S</b> C <b>P</b> A <b>C</b> P | 320 |
| 321 | <b>G</b> S <b>N</b> T <b>I</b> R <b>N</b> Q <b>I</b>   | N <b>A</b> L <b>T</b> S <b>F</b> V <b>D</b> A <b>S</b> | M <b>V</b> Y <b>G</b> S <b>E</b> B <b>P</b> L <b>A</b> | <b>R</b> N <b>L</b> R <b>N</b> M <b>S</b> N <b>Q</b> L | <b>G</b> L <b>L</b> A <b>V</b> N <b>Q</b> R <b>F</b> Q | <b>D</b> N <b>G</b> R <b>A</b> L <b>L</b> P <b>F</b> D | <b>N</b> L <b>H</b> D <b>D</b> P <b>C</b> L <b>L</b> T | <b>N</b> R <b>S</b> A <b>R</b> I <b>P</b> C <b>F</b> L | 400 |
| 401 | A <b>G</b> D <b>T</b> R <b>S</b> E <b>M</b> P          | E <b>L</b> T <b>S</b> M <b>H</b> T <b>L</b> L <b>L</b> | <b>R</b> E <b>H</b> N <b>E</b> L <b>A</b> T <b>E</b> L | <b>K</b> S <b>L</b> N <b>P</b> R <b>W</b> D <b>G</b> E | <b>R</b> L <b>Y</b> Q <b>E</b> A <b>R</b> K <b>I</b> V | <b>G</b> A <b>M</b> V <b>Q</b> I <b>I</b> T <b>Y</b> R | D <b>Y</b> L <b>P</b> L <b>V</b> L <b>G</b> P <b>T</b> | <b>A</b> M <b>R</b> K <b>Y</b> L <b>P</b> T <b>Y</b> R | 480 |
| 481 | <b>S</b> Y <b>N</b> D <b>S</b> V <b>D</b> P <b>R</b> I | A <b>N</b> V <b>F</b> T <b>N</b> A <b>F</b> R <b>Y</b> | G <b>H</b> T <b>L</b> I <b>Q</b> P <b>F</b> M <b>F</b> | <b>R</b> L <b>D</b> N <b>E</b> Y <b>Q</b> P <b>M</b> E | <b>P</b> N <b>P</b> R <b>V</b> P <b>L</b> S <b>E</b> V | <b>F</b> F <b>A</b> S <b>W</b> R <b>V</b> V <b>L</b> E | <b>G</b> G <b>I</b> D <b>P</b> I <b>L</b> R <b>G</b> L | <b>M</b> A <b>T</b> P <b>A</b> K <b>L</b> N <b>R</b> Q | 560 |
| 561 | N <b>Q</b> I <b>A</b> V <b>D</b> E <b>I</b> R <b>E</b> | <b>R</b> L <b>F</b> E <b>Q</b> V <b>M</b> R <b>I</b> G | <b>L</b> D <b>L</b> P <b>A</b> L <b>N</b> M <b>Q</b> R | <b>S</b> R <b>D</b> H <b>G</b> L <b>P</b> G <b>Y</b> N | <b>A</b> W <b>R</b> R <b>F</b> C <b>G</b> L <b>P</b> Q | <b>P</b> E <b>T</b> V <b>G</b> Q <b>L</b> G <b>T</b> V | <b>L</b> R <b>N</b> L <b>K</b> L <b>A</b> R <b>K</b> L | <b>M</b> E <b>Q</b> Y <b>G</b> T <b>P</b> N <b>N</b> I | 640 |
| 641 | D <b>I</b> W <b>M</b> G <b>V</b> S <b>E</b> P          | <b>L</b> K <b>R</b> K <b>G</b> E <b>V</b> G <b>P</b> L | <b>L</b> A <b>C</b> I <b>I</b> G <b>T</b> Q <b>F</b> R | <b>K</b> L <b>E</b> D <b>G</b> D <b>R</b> F <b>W</b> W | <b>E</b> N <b>E</b> G <b>V</b> F <b>S</b> M <b>Q</b> Q | <b>R</b> Q <b>A</b> L <b>A</b> Q <b>I</b> S <b>L</b> P | <b>R</b> I <b>I</b> C <b>D</b> N <b>T</b> G <b>I</b> T | <b>T</b> V <b>S</b> K <b>N</b> N <b>I</b> F <b>M</b> S | 720 |
| 721 | <b>N</b> S <b>Y</b> P <b>R</b> D <b>V</b> N <b>C</b>   | <b>S</b> T <b>L</b> P <b>A</b> L <b>N</b> L <b>A</b> S | <b>W</b> R <b>E</b> A <b>S</b>                         |                                                        |                                                        |                                                        |                                                        |                                                        | 745 |

The matched peptides cover 16% (125/745 AA's) of the protein.

Protein Name: Mutant MPO

Species: HUMAN

PN.user Accession #: 2

MS Digest Index #: 2

Masses are:

pI of Protein: 9.19

Protein MW: 83842.1 Da

Amino Acid Composition: A57 C17 D36 E35 F31 G45 H7 I30 K22 L87 M23 N41 P55 Q33 R66 S47 T39 V43 W12 Y19

MS Digest - Agilent Spectrum Mill Rev. 3.3.078

Supporting material 7 Van Antwerpen et al.: Peptide mapping of the four different MPO after enrichment on ConA column. Mapping was done by LC-ESI-MSMS and the protein summary was generated with Spectrum Mill ® (Agilent, Palo Alto, CA USA); **A** untreated recombinant myeloperoxidase; **B** recombinant myeloperoxidase incubated for 5 days at 37 °C in the absence of deglycosylation enzymes. **C** recombinant myeloperoxidase incubated for 5 days at 37 °C in the presence of deglycosylation enzymes. Glycosylation sites are in green and recorded peptides in red. The MPO sequence starts with the propeptide sequence. **D** Recombinant mutant myeloperoxidase (Q257→T) devoid of heme retaining the six N-glycosylation sites.
