# Supplementary material
Source: PubMed Central journal article supplement (PMC2871502)
Supplement: supp_M109.089748_jbc.M109.089748-8.pdf [file supp_M109.089748_jbc.M109.089748-8.pdf]

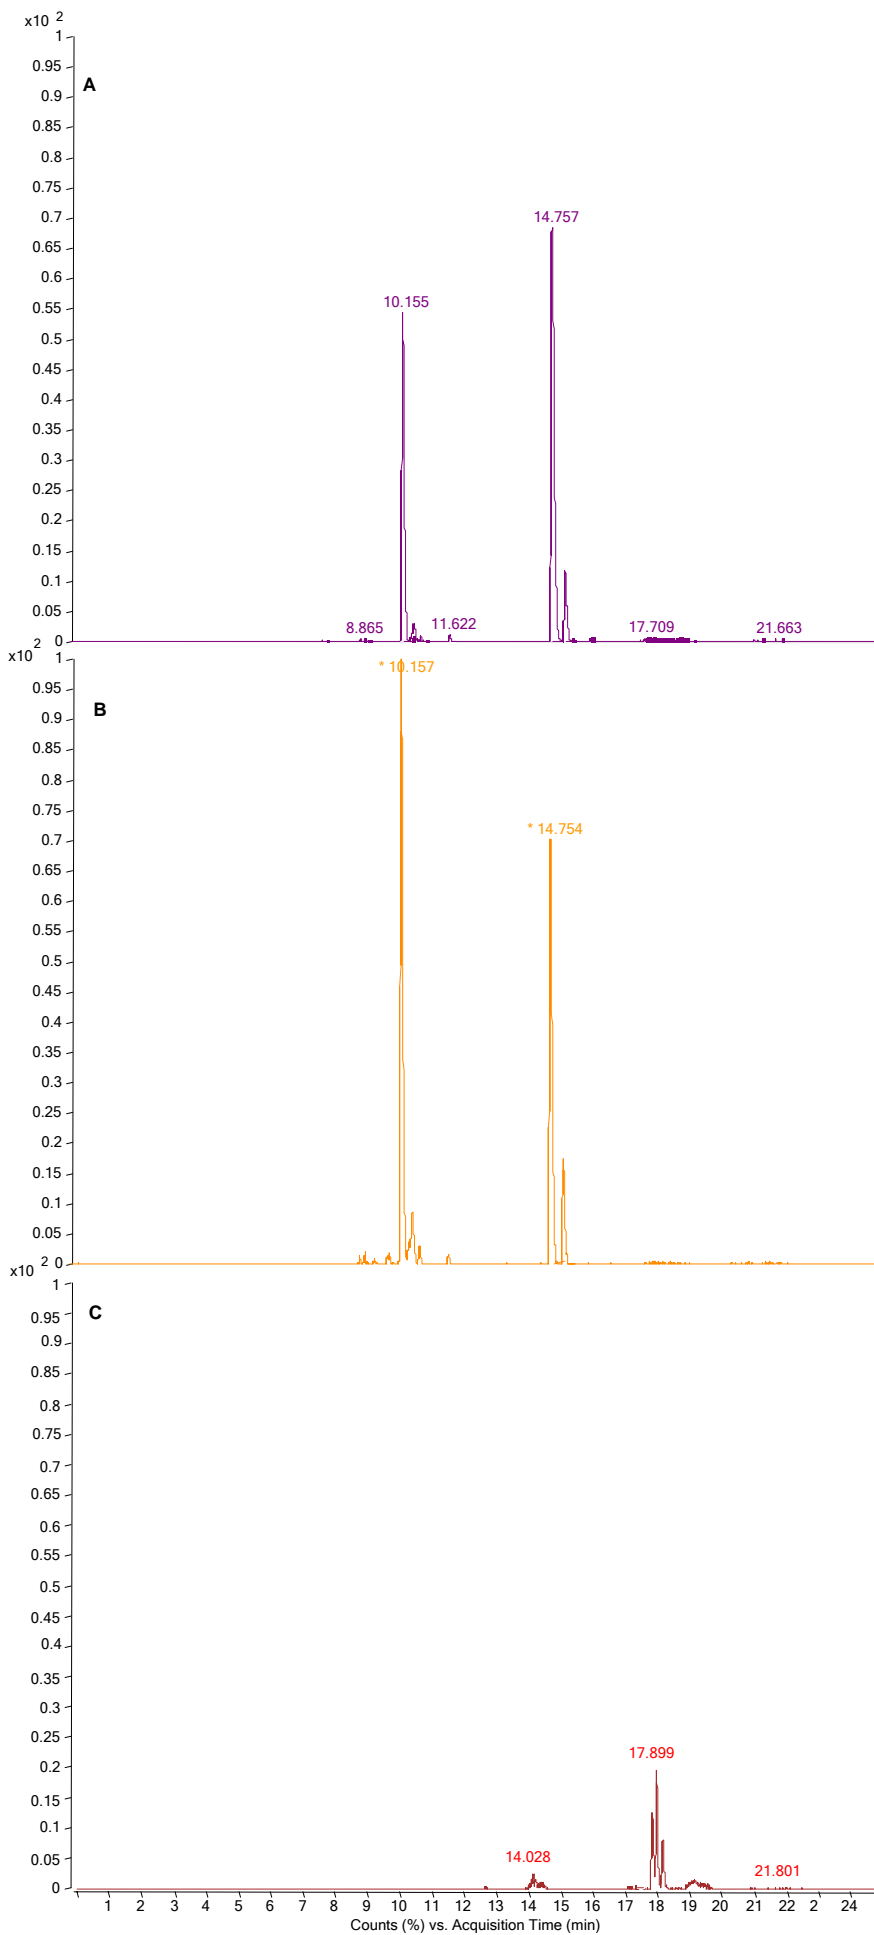

Supporting material 8 Van Antwerpen et al: extracted chromatograms merging multiple masses at 525.6030, 779.9034, 787.9010 m/z corresponding respectively to methionine oxidized peptide (MH<sub>3</sub>)<sup>3+</sup>, methionine peptide (MH<sub>2</sub>)<sup>2+</sup> and methionine oxidized peptide (MH<sub>2</sub>)<sup>2+</sup>; The peptide has a retention time at 10.15 min. confirmed by deconvoluted spectra showing a peak at 1573.79 (MH<sup>+</sup>) (N<sub>355</sub>M(Ox)SNQLGLLAVNQR) **A**: recombinant MPO, **B**: MPO incubated 5 days at 37°C (MPO37°C), **C**: MPO treated by glycosidases during 5 days at 37°C.
