# Supplementary material
Source: PubMed Central journal article supplement (PMC2871502)
Supplement: supp_M109.089748_jbc.M109.089748-9.pdf [file supp_M109.089748_jbc.M109.089748-9.pdf]

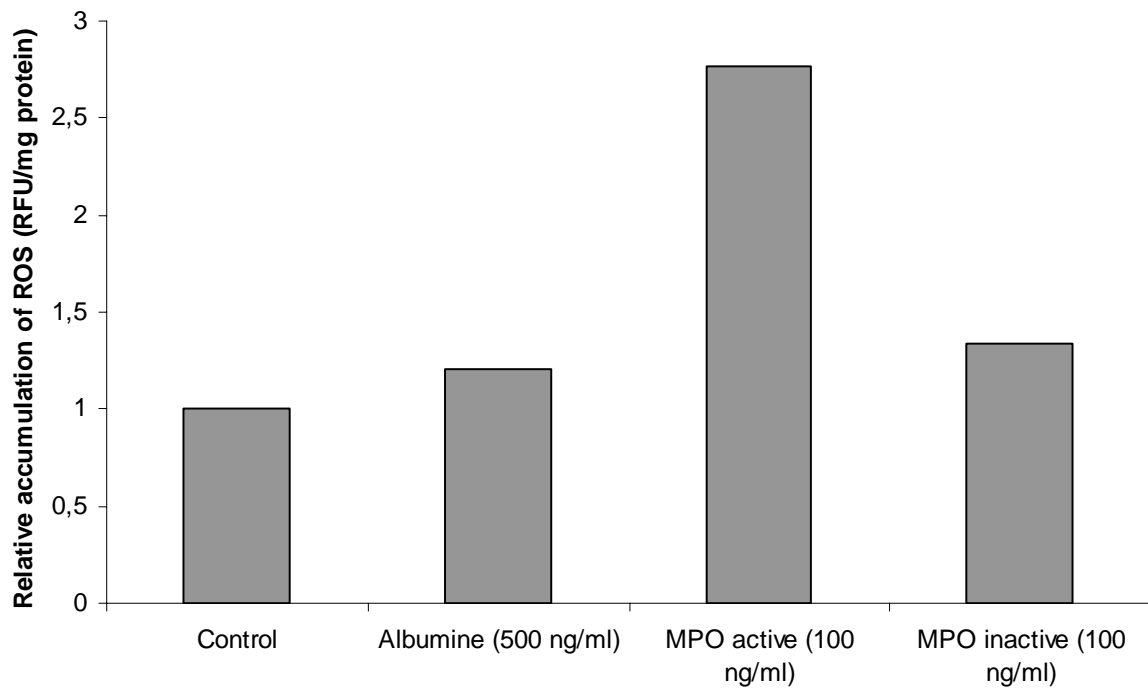

Supporting material 9 Van Antwerpen et al.: Measurement of the ROS production in endothelial cells (Eahy926) in the presence of recombinant MPO and its inactive form (MPO Q91/Y) compared to control and albumin.
