# Supplementary material
Source: PubMed Central journal article supplement (PMC2871502)

Supporting Material 1, Vanantwerpen et al. : Scheme of the experimental procedure

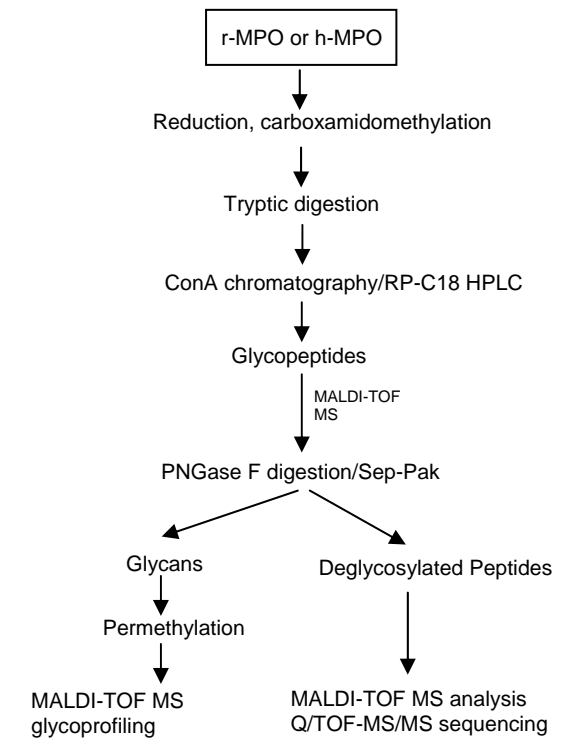

Supplement: supp_M109.089748_jbc.M109.089748-1.pdf [file supp_M109.089748_jbc.M109.089748-1.pdf]
